# Supplementary material
Source: PubMed Central journal article supplement (PMC3246350)
Supplement: ci200319e_si_001.pdf [file ci200319e_si_001.pdf]

# Supporting Information Section

## Rationalizing Tight Ligand Binding Through Cooperative Interaction Networks

*Bernd Kuhn<sup>\*†</sup>, Julian E. Fuchs<sup>‡§</sup>, Michael Reutlinger<sup>‡#</sup>, Martin Stahl<sup>†</sup>, and Neil R. Taylor<sup>\*‡</sup>*

<sup>†</sup> Discovery Chemistry, F. Hoffmann-La Roche AG, CH-4070 Basel, Switzerland

<sup>‡</sup> Desert Scientific Software Pty Ltd, Level 5 Nexus Building, Norwest Business Park, 4 Columbia Court, Baulkham Hills, NSW, 2153, Australia

<sup>§</sup> Present address: Institute of General, Inorganic and Theoretical Chemistry, University of Innsbruck, A-6020 Innsbruck, Austria

<sup>#</sup> Present address: Institute of Pharmaceutical Sciences, Swiss Federal Institute of Technology Zurich, CH-8093 Zurich, Switzerland

to whom correspondence should be addressed: for queries regarding interactions and medicinal chemistry case studies: Dr. Bernd Kuhn, F. Hoffmann-La Roche AG, PRCB 92/2.56B, CH-4070 Basel, Switzerland, Phone +41 616889773, email [bernd.kuhn@roche.com](mailto:bernd.kuhn@roche.com); for queries regarding the network concepts and software details: Dr. Neil R. Taylor, Desert Scientific Software Pty Ltd, Level 5 Nexus Building, Norwest Business Park, 4 Columbia Court, Baulkham Hills, NSW, 2153, Australia, Phone +612 8860 6466, email [neil.taylor@desertsci.com](mailto:neil.taylor@desertsci.com)

### Table of Contents

|                                                                                          |    |
|------------------------------------------------------------------------------------------|----|
| Ligand structures and logarithmic potency values for the Neuraminidase training set      | S1 |
| Public X-ray structures used in the training set for pose prediction                     | S2 |
| Optimized scoring function parameters for pose prediction ( $S_{\text{Scorpion,pose}}$ ) | S3 |
| External test of $S_{\text{Scorpion,pose}}$                                              | S4 |
| External test of $S_{\text{Scorpion}}$                                                   | S5 |
| Virtual screening results on targets of the DUD data set with $S_{\text{Scorpion}}$      | S6 |

**Figure S1:** Ligand structures and logarithmic potency values for the Neuraminidase training set

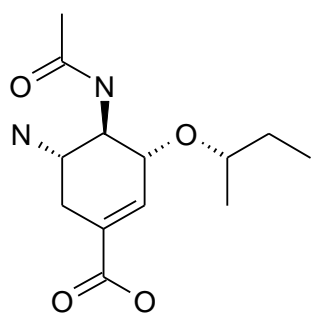

A: 8.0  
B: 8.8

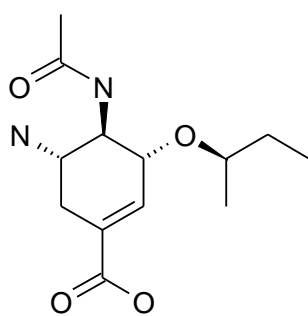

A: 8.0  
B: 8.2

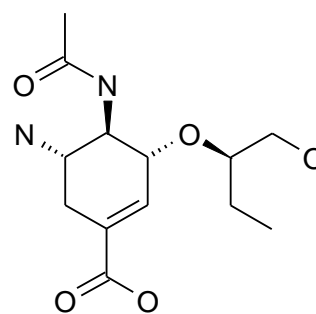

A: 7.6

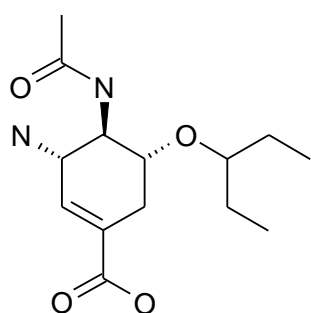

A: 7.5

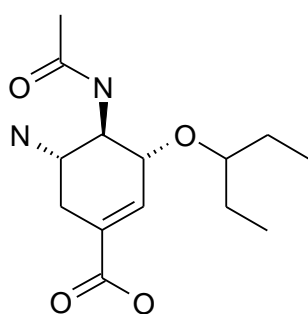

A: 8.9  
B: 8.5

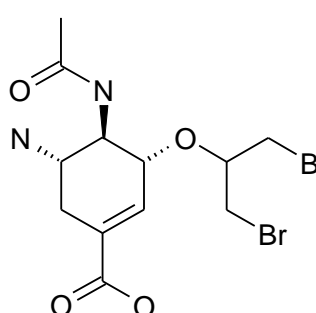

A: 9.2

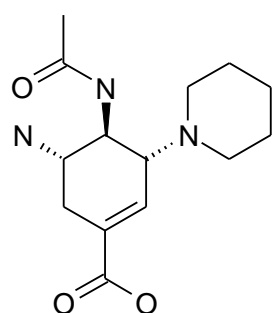

A: 7.5

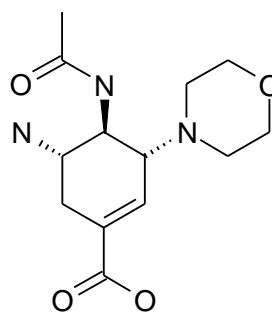

A: 6.7

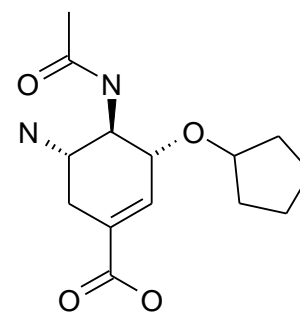

A: 7.7

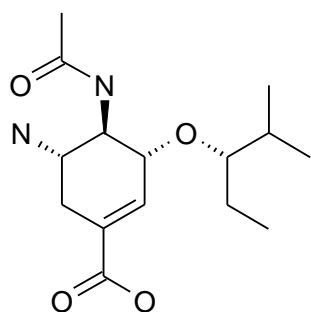

A: 8.7  
B: 8.1

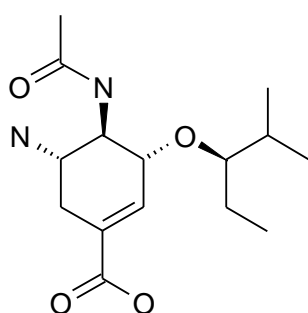

A: 9.5

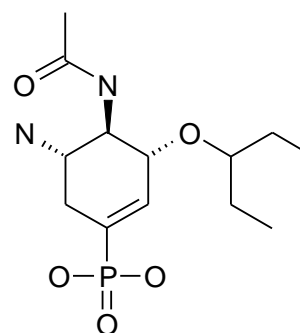

A: 8.7  
B: 7.1

Figure S1 (continued)

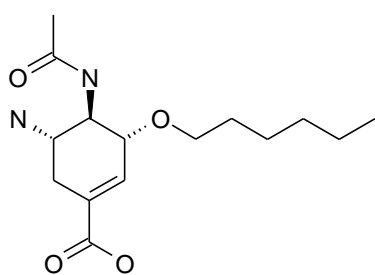

A: 6.8

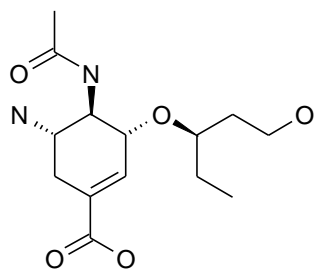

A: 7.5

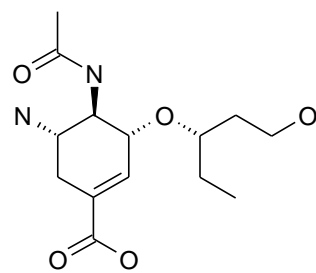

A: 7.4

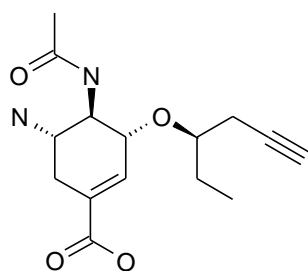

A: 8.2  
B: 9.1

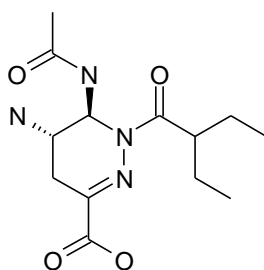

A: 8.3

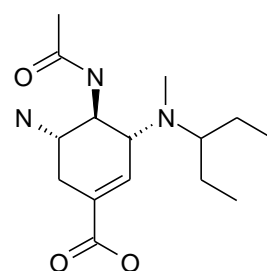

A: 8.2

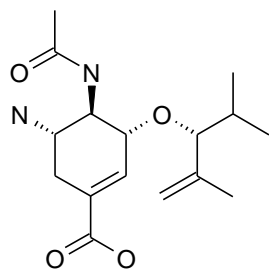

A: 9.4

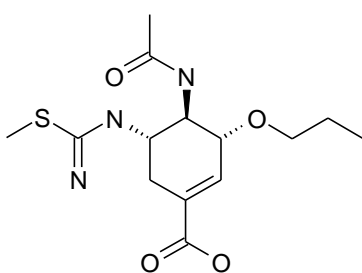

A: 7.5

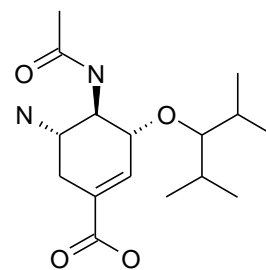

A: 10.0  
B: 8.6

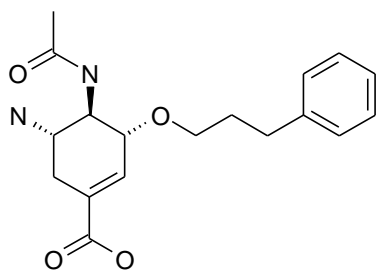

A: 7.0

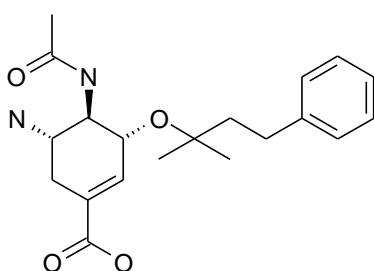

A: 9.2

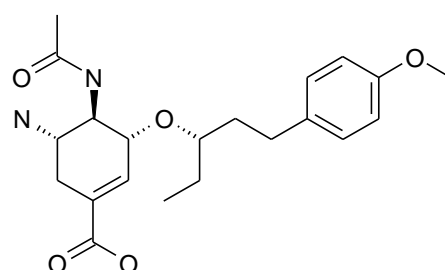

A: 9.3

**Table S2:** Public X-ray structures used in the training set for pose prediction.

| PDB code | Protein                      |
|----------|------------------------------|
| 1b9v     | neuraminidase                |
| 1f8b     | neuraminidase                |
| 1h1s     | cdk2                         |
| 1lpz     | factor Xa                    |
| 1o5r     | adenosine deaminase          |
| 1of1     | thymidine kinase             |
| 1oi9     | cdk2                         |
| 1tow     | fatty acid binding protein 4 |
| 1uu9     | pdk1                         |
| 1x70     | dpp4                         |
| 1y2c     | pde4                         |
| 1ydr     | pkaca                        |
| 1yds     | pkaca                        |
| 1z5m     | pdk1                         |
| 1z95     | androgen receptor            |
| 2axa     | androgen receptor            |
| 2c68     | cdk2                         |
| 2c93     | thrombin                     |
| 2cte     | carboxypeptidase a           |
| 2gnj     | pkaca                        |
| 2hha     | dpp4                         |
| 2hny     | hiv reverse transcriptase    |
| 2ihq     | androgen receptor            |
| 2iiv     | dpp4                         |
| 2j34     | factor Xa                    |
| 2jdo     | akt2                         |
| 2oag     | dpp4                         |
| 2oph     | dpp4                         |
| 2pog     | estrogen receptor $\alpha$   |

**Table S3:** Optimized scoring function parameters for pose prediction ( $S_{\text{Scorpion,pose}}$ ), see also

Equation (3) of the manuscript.

| Interaction type (i) | Pairwise interaction coefficient ( $p_i$ ) | Network coefficient ( $n_i$ ) | Network threshold ( $n_{\text{thres},i}$ ) |
|----------------------|--------------------------------------------|-------------------------------|--------------------------------------------|
| hydrogen bond        | 0.90                                       | –                             | –                                          |
| vdW                  | 0.097                                      | 0.20                          | 4                                          |
| $\pi$ - $\pi$        | 0.34                                       | 0.20                          | 4                                          |
| ionic                | 0.40                                       | –                             | –                                          |
| cation- $\pi$        | 0.41                                       | –                             | –                                          |
| unf_hydrogen bond    | -1.38                                      | –                             | –                                          |
| unf_dipole           | -0.81                                      | –                             | –                                          |
| clash_apolar         | -1.25                                      | –                             | –                                          |
| clash_polar          | -1.25                                      | –                             | –                                          |
| desolv_donor         | -1.14                                      | –                             | –                                          |
| desolv_acceptor      | -0.97                                      | –                             | –                                          |

**Table S4:** External test of  $S_{\text{Scorpion,pose}}$  in reproducing the experimentally observed binding mode within a root mean square distance (RMSD) of 2.0Å of the top-ranked pose. Binding poses and results from other scoring functions were taken from the data set of Wang et al.,<sup>1</sup> which contains 100 computer-generated binding poses for each of 100 protein structures. For each of the ligand poses we calculated ligand strain energies as detailed in the Methods section. Poses with a strain energy > 2 kcal/mol were eliminated.

| Scoring function                             | Success rate (%) |
|----------------------------------------------|------------------|
| PLP (Cerius2)                                | 76               |
| FScore (Sybyl)                               | 74               |
| LigScore (Cerius2)                           | 74               |
| DrugScore                                    | 72               |
| <b><math>S_{\text{Scorpion,pose}}</math></b> | <b>70</b>        |
| Ludi (Cerius2)                               | 67               |
| XScore                                       | 66               |
| AutoDock                                     | 62               |
| PMF (Cerius2)                                | 52               |
| GScore (Sybyl)                               | 42               |
| ChemScore (Sybyl)                            | 35               |
| DScore (Sybyl)                               | 26               |

**Table S5:** External test of  $S_{\text{Scorpion}}$  in ranking binding affinities. The four subsets are taken from Englebienne and Moitessier (see Table S3 in this publication).<sup>2</sup> Kendall's  $\tau$  is used as a rank correlation measure. There is zero overlap in complexes between our training and the external test sets.

| Scoring function         | HIV protease | thrombin    | trypsin     | thrombin/<br>trypsin/<br>factorXa | Average     |
|--------------------------|--------------|-------------|-------------|-----------------------------------|-------------|
| No. of complexes         | 11           | 22          | 13          | 42                                |             |
| RankScore                | 0.55         | 0.68        | 0.36        | 0.61                              | <b>0.55</b> |
| XScore                   | 0.73         | 0.31        | 0.44        | 0.41                              | <b>0.47</b> |
| DrugScore <sup>CSD</sup> | 0.55         | 0.42        | 0.46        | 0.44                              | <b>0.47</b> |
| PLP1 (Cerius2)           | 0.59         | 0.48        | 0.31        | 0.49                              | <b>0.47</b> |
| $S_{\text{Scorpion}}$    | <b>0.59</b>  | <b>0.49</b> | <b>0.23</b> | <b>0.51</b>                       | <b>0.46</b> |
| DockScore (Sybyl)        | 0.62         | 0.37        | 0.39        | 0.46                              | <b>0.46</b> |
| DrugScore <sup>PDB</sup> | 0.48         | 0.56        | 0.18        | 0.56                              | <b>0.44</b> |
| PLP2 (Cerius2)           | 0.59         | 0.39        | 0.31        | 0.45                              | <b>0.43</b> |
| GoldScore (Sybyl)        | 0.44         | 0.55        | 0.18        | 0.50                              | <b>0.42</b> |
| LigScore2 (Cerius2)      | 0.51         | 0.45        | 0.25        | 0.42                              | <b>0.41</b> |
| Hammerhead (Cerius2)     | 0.48         | 0.30        | 0.49        | 0.31                              | <b>0.40</b> |
| PMF (Cerius2)            | 0.55         | 0.25        | 0.36        | 0.35                              | <b>0.38</b> |
| ChemScore (Sybyl)        | 0.62         | 0.06        | 0.56        | 0.27                              | <b>0.38</b> |
| GlideScore               | 0.51         | 0.31        | 0.31        | 0.33                              | <b>0.37</b> |
| LigScore1 (Cerius2)      | 0.44         | 0.43        | 0.18        | 0.37                              | <b>0.35</b> |
| MW                       | 0.26         | 0.49        | 0.13        | 0.46                              | 0.33        |
| eHiTS SF                 | 0.37         | 0.46        | 0.08        | 0.39                              | <b>0.32</b> |
| Surflex SF               | 0.48         | 0.18        | 0.31        | 0.30                              | <b>0.32</b> |
| FlexXScore (Sybyl)       | 0.66         | -0.02       | 0.39        | 0.08                              | <b>0.27</b> |
| PMF (Sybyl)              | -0.18        | 0.29        | -0.03       | 0.30                              | <b>0.10</b> |

**Table S6:** Comparison of ROC virtual screening enrichments<sup>3</sup> at several early false positive rates for different targets of the DUD data set.<sup>4</sup> SP stands for Glide/SP docking and scoring. Results for  $S_{\text{Scorpion}}$  were obtained from rescoring the top-ranked Glide/SP docking poses. ACHE: Acetylcholine esterase, FGFr1: Fibroblast growth factor receptor kinase, FXa: Factor Xa, HIVPR: HIV protease, NA: Neuraminidase, P38: P38 mitogen activated protein kinase, PDGFrB: Platelet derived growth factor receptor kinase, PR: Progesterone receptor.

|        | 0.5% |                       | 1.0% |                       | 2.0% |                       |
|--------|------|-----------------------|------|-----------------------|------|-----------------------|
|        | SP   | $S_{\text{Scorpion}}$ | SP   | $S_{\text{Scorpion}}$ | SP   | $S_{\text{Scorpion}}$ |
| ACHE   | 0.0  | <b>0.0</b>            | 0.0  | <b>0.0</b>            | 0.0  | <b>0.5</b>            |
| FGFr1  | 1.6  | <b>0.0</b>            | 1.6  | <b>0.8</b>            | 2.5  | <b>1.2</b>            |
| FXa    | 42.1 | <b>20.1</b>           | 30.5 | <b>11.6</b>           | 19.2 | <b>7.5</b>            |
| HIVPR  | 12.0 | <b>15.3</b>           | 7.8  | <b>8.0</b>            | 6.4  | <b>4.1</b>            |
| NA     | 68.8 | <b>3.8</b>            | 40.3 | <b>6.0</b>            | 23.1 | <b>8.0</b>            |
| P38    | 0.4  | <b>0.9</b>            | 0.4  | <b>1.1</b>            | 0.6  | <b>1.8</b>            |
| PDGFrB | 1.2  | <b>3.9</b>            | 0.6  | <b>2.0</b>            | 0.3  | <b>1.3</b>            |
| PR     | 0.0  | <b>15.2</b>           | 0.0  | <b>11.4</b>           | 1.8  | <b>5.7</b>            |



## References

1. Wang, R.; Lu, Y. P.; Wang, S. M., Comparative evaluation of 11 scoring functions for molecular docking. *J. Med. Chem.* **2003**, *46*, 2287-2303.
2. Englebienne, P.; Moitessier, N., Docking Ligands into Flexible and Solvated Macromolecules. 4. Are Popular Scoring Functions Accurate for this Class of Proteins? *J. Chem. Inf. Model.* **2009**, *49*, 1568-1580.
3. Nicholls, A., What do we know and when do we know it? *J. Comput.-Aided Mol. Des.* **2008**, *22*, 239-255.
4. Huang, N.; Shoichet, B. K.; Irwin, J. J., Benchmarking Sets for Molecular Docking. *J. Med. Chem.* **2006**, *49*, 6789-6801.
